# Supplementary material for: Oncologic Outcomes of Lymph Node Dissection at Salvage Radical Prostatectomy
Source: MDPI journal article supplement (doi:10.3390/cancers15123123), 2023-06-09
Supplement: s1 [file s1]

**Supplementary Table S1: Descriptive characteristics of 727 patients with recurrent prostate cancer that underwent salvage radical prostatectomy and lymph node dissection, stratified according to lymph node negative (pN0) and positive (pN1).**

| Variable                                 | pN0, N = 576<br>(79%) <sup>1</sup> | pN1, N = 151<br>(21%) <sup>1</sup> | p-value <sup>2</sup> |
|------------------------------------------|------------------------------------|------------------------------------|----------------------|
| <b>PSA before SRP, ng/ml</b>             | 5.4 (5.0)                          | 10.5 (21.9)                        | 0.005                |
| <b>Age at SRP, yrs</b>                   | 66 (7)                             | 67 (7)                             | 0.2                  |
| <b>Lymph nodes removed</b>               | 13 (9)                             | 16 (10)                            | <0.001               |
| <b>Original treatment type</b>           |                                    |                                    | 0.2                  |
| Radiotherapy                             | 339 (62%)                          | 96 (68%)                           |                      |
| Brachy                                   | 115 (21%)                          | 29 (21%)                           |                      |
| Focal                                    | 92 (17%)                           | 16 (11%)                           |                      |
| <b>Pathological stage</b>                |                                    |                                    | <0.001               |
| ≤pT2                                     | 300 (52%)                          | 38 (25%)                           |                      |
| pT3a                                     | 126 (22%)                          | 30 (20%)                           |                      |
| ≥pT3b                                    | 149 (26%)                          | 83 (55%)                           |                      |
| <b>Surgical approach</b>                 |                                    |                                    | 0.7                  |
| ORP                                      | 404 (70%)                          | 108 (72%)                          |                      |
| RARP                                     | 172 (30%)                          | 43 (28%)                           |                      |
| <b>Surgical margins</b>                  |                                    |                                    | <0.001               |
| Negative                                 | 435 (76%)                          | 92 (61%)                           |                      |
| Positive                                 | 141 (24%)                          | 59 (39%)                           |                      |
| <b>Biopsy Gleason score before SRP *</b> |                                    |                                    | <0.001               |
| ≤6                                       | 106 (21%)                          | 16 (12%)                           |                      |
| 7                                        | 261 (51%)                          | 53 (40%)                           |                      |
| ≥8                                       | 149 (29%)                          | 63 (48%)                           |                      |
| <b>Pathologic Gleason score *</b>        |                                    |                                    | <0.001               |
| ≤6                                       | 46 (8.3%)                          | 2 (1.4%)                           |                      |
| 7                                        | 326 (59%)                          | 59 (41%)                           |                      |
| ≥8                                       | 183 (33%)                          | 83 (58%)                           |                      |

<sup>1</sup> Mean (SD); n (%)

<sup>2</sup> Welch Two Sample t-test; Pearson's Chi-square test

Abbreviations: ORP – open retropubic prostatectomy, PSA – prostatic specific antigen; RARP – robotic assisted laparoscopic prostatectomy; SD – standard deviation ;SRP – salvage radical prostatectomy.

\* pathologic assessment might be affected by primary treatment modality.
